# Supplementary material for: An “off–on” electrochemiluminescence biosensor based on CRISPR-Cas12a for ultrasensitive determination of aflatoxin B1
Source: Royal Society of Chemistry journal article supplement (doi:10.1039/d5an01369k), 2026-01-01
Supplement: d5an01369k1.pdf [file d5an01369k1.pdf]

## SUPPORTING INFORMATION

### **An “off-on” Electrochemiluminescence Biosensor Based on CRISPR-Cas12a for Ultrasensitive Detection of Aflatoxin B1**

Zhi-Hong Xu,<sup>a#</sup> Xiao Hu,<sup>a#</sup> Xin Weng,<sup>a</sup> Ruo-Mei Lin,<sup>a</sup> Wen Xu,<sup>a\*</sup> Li-Shuang Yu,<sup>a\*</sup>  
and Hang Gao<sup>b\*</sup>

<sup>a</sup> College of Pharmacy, Fujian University of Traditional Chinese Medicine, Fuzhou, 350122, China

<sup>b</sup> School of Chemistry and Materials, Yangzhou University, Yangzhou 225002, China

# These authors contributed equally.

\*Corresponding author E-mail: [2012029@fjtcn.edu.cn](mailto:2012029@fjtcn.edu.cn) (W. Xu); [yuls66@fjtcn.edu.cn](mailto:yuls66@fjtcn.edu.cn) (L. Yu); [gaohang@yzu.edu.cn](mailto:gaohang@yzu.edu.cn) (H. Gao)

### **Table of contents**

- 1. Preparation of Pdots**
- 2. Treatment of real samples**
- 3. <sup>1</sup>H NMR spectrum of polymer**
- 4. PL spectra and PL trends of polymer with different water fractions**
- 5. UV-vis absorption spectrum of Pdots**
- 6. CV diagram of Pdots in TEA**
- 7. Optimization of oxidative-reductive coreactants**
- 8. UV-vis absorption spectrum of BHQ and PL emission spectrum of Pdots**
- 9. PAGE of TDN.**
- 10. Optimization of the TEA concentration.**

## **11. Comparison of the proposed “off-on” biosensor and previous reports on OTA detection.**

## **12. Reference.**

### **1. Preparation of Pdots.**

Pdots were prepared via a nano-coprecipitation method.<sup>1,2</sup> First, a THF solution of 100 µg/mL polymer was as the stock solution. Then, 2 mL polymer solution was quickly injected into the ultrapure water, which was degassed by sonication before use. After continued sonication for 3 min, the solution was concentrated to 2 mL by vacuum distillation through a rotary evaporator. Finally, the reaction solution was filtered to obtain a Pdots suspension with carboxyl groups.

### **2. Treatment of real samples**

For the spiked sample assays, *Anoectochilus roxburghii* was first pulverized using a grinder to yield a homogeneous powder. Spiked samples were then prepared by incorporating specific amounts of AFB1 standards into the homogenized powder. Subsequently, 30 mL of a mixed organic solvent (methanol/water, 70:30, v/v) was added, and the mixture was stirred thoroughly for 30 min. Following vacuum filtration, the resulting filtrate was collected, appropriately diluted, and subjected to ECL scanning analysis.

### 3. $^1\text{H}$ NMR spectrum of polymer

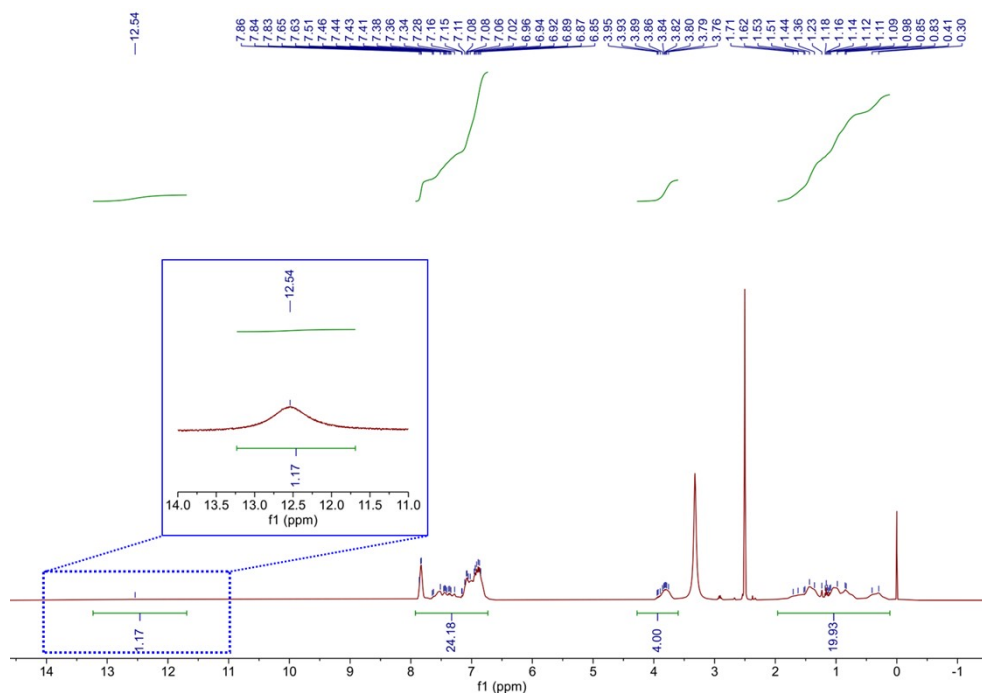

**Figure S1.** Nuclear magnetic resonance spectroscopy ( $^1\text{H}$  NMR) of polymer. Inset: enlarged region of dashed box.

$^1\text{H}$  NMR (400 MHz, DMSO- $d_6$ )  $\delta$  (ppm): 12.54 (s), 7.86-6.85 (m, 24H), 3.95-3.76 (m, 4H), 1.71-0.30 (m, 20 H).

### 4. PL spectra and PL trends of polymer with different water fractions

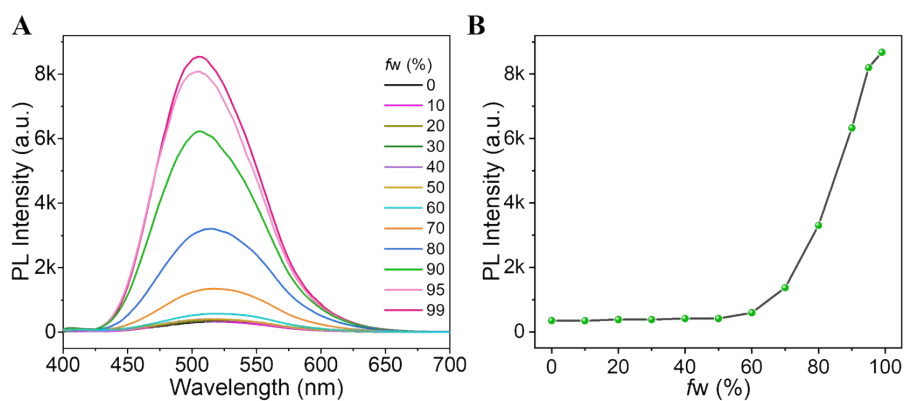

**Figure S2.** PL spectra (A) and PL trends (B) of polymer in THF/H<sub>2</sub>O mixtures with different  $fw$ s ( $10^{-5}$  mol L $^{-1}$ ).

## 5. UV-vis absorption spectrum of Pdots

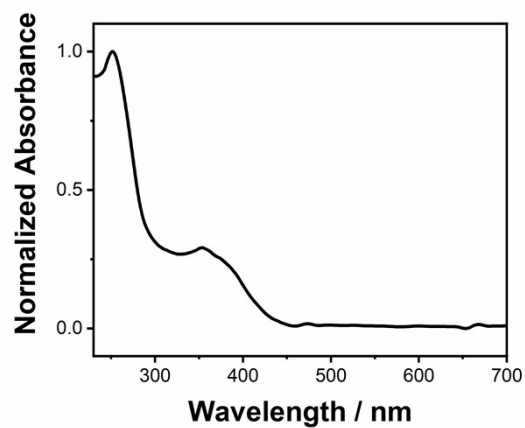

**Figure S3.** UV-vis absorption spectrum of Pdots.

## 6. CV diagram of Pdots in TEA

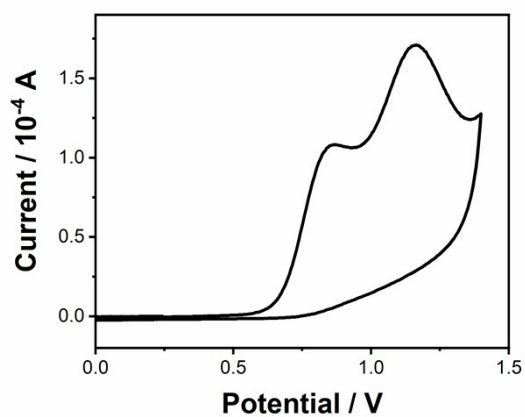

**Figure S4.** CV diagram of Pdots in TEA

## 7. Optimization of oxidative-reductive coreactants

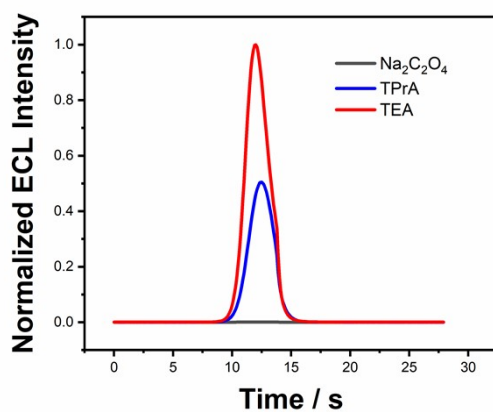

**Figure S5.** ECL intensity-time curves of Pdots/GCE in 0.1 M PBS with different co-reactants (25 mM).

## 8. UV-vis absorption spectrum of BHQ and PL emission spectrum of Pdots

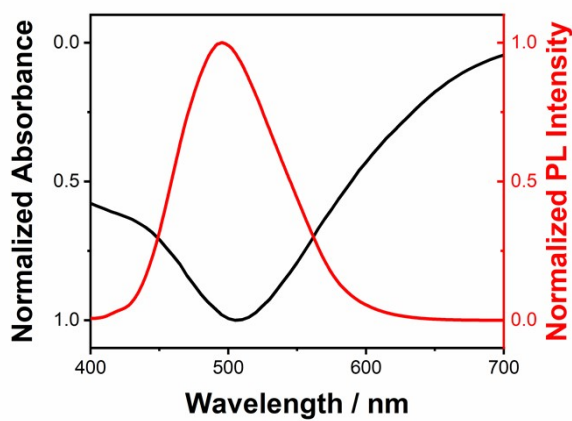

**Figure S6.** UV-vis absorption spectrum of BHQ and PL emission spectrum of Pdots.

## 9. PAGE of TDN.

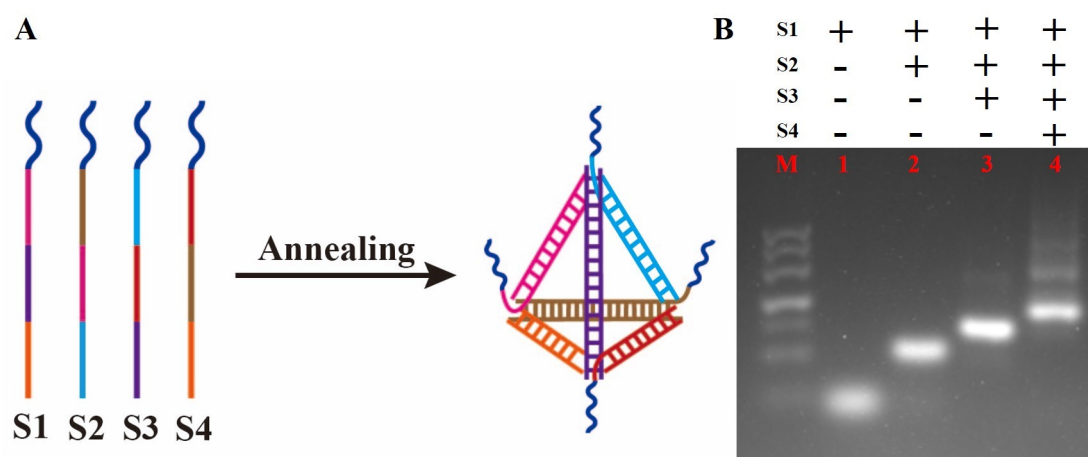

**Figure S7.** (A) Assembling of TDNs. (B) PAGE analysis of TDN.

## 10. Optimization of the TEA concentration.

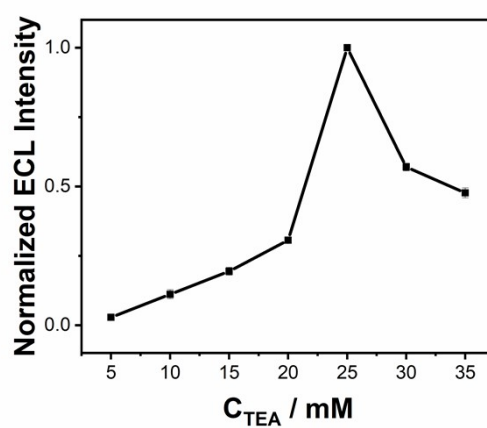

**Figure S8.** Optimization of the TEA concentration.

## 11. Comparison of the proposed ECL biosensor and previous reports on AFB1 detection

**Table S1.** Comparison of the current approach and previous reports on AFB1 detection

| Methods          | Dynamic range    | Detection limit | Reference |
|------------------|------------------|-----------------|-----------|
| Fluorescence     | 0.10-400 ng/mL   | 0.09 ng/mL      | [3]       |
| Fluorescence     | 0-3.33 ng/mL     | 0.08 ng/mL      | [4]       |
| Fluorescence     | 0.01-100 ng/mL   | 5.81 pg/mL      | [5]       |
| Electrochemistry | 0.05-360 ng/mL   | 3.5 pg/mL       | [6]       |
| Electrochemistry | 0.001-1000 ng/mL | 0.34 pg/mL      | [7]       |
| Electrochemistry | 0.001-1000 ng/mL | 0.17 pg/mL      | [8]       |
| ECL              | 0.05-100 ng/mL   | 0.01 ng/mL      | [9]       |
| ECL              | 0.001-1000 ng/mL | 0.46 pg/mL      | [10]      |
| ECL              | 0.1-1000 pg/mL   | 0.06 pg/mL      | This work |

## 12. References

- (1) Y. Chen, Y. He, J. Zhao, J. Zhang, R. Yuan and S. Chen, *Anal. Chem.*, 2022, **94**, 4446-4454.
- (2) Z. Mao, C. Dai, Y. Xu, J. Jia, L. Ke and Y. Zhou, *Anal. Chem.*, 2024, **96**, 12760-12766.
- (3) Y. Kong, Y. Zhu, J. Song, Q. Liu, L. Song, X. Fei and X. Li, *Food Chem.*, 2023, **426**, 136645.
- (4) X. Dou, G. Wu, Z. Ding and J. Xie, *Food Chem.*, 2023, **416**, 135805.
- (5) X. Gao, Y. Liu, J. Wei, Z. Wang and X. Ma, *Spectrochim. Acta, Part A*, 2024, **315**, 124268.
- (6) W. Li, Y. Shi, X. Zhang, X. Hu, X. Huang, N. Liang, T. Shen, X. Zou and J. Shi, *Food Chem.*, 2024, **442**, 138312.
- (7) X. Jia, Y. Xu, Z. Suo, W. Ren, R. Zhao and B. He, *Sens. Actuators, B*, 2025, **426**, 137118.
- (8) Y. Jin, Z. Wu, C. Hu, W. Wen, X. Zhang and S. Wang, *Chem. Eng. J.*, 2023, **469**, 143830.
- (9) C. Sun, X. Liao, B. Jia, L. Shi, D. Zhang, R. Wang, L. Zhou and W. Kong, *Mikrochim. Acta*, 2020, **187**, 236.
- (10) J. Li, S. Wang, H. Yang, R. Li, R. Cai and W. Tan, *Sens. Actuators, B*, 2023, **380**, 133407.
